# Supplementary material for: Towards Development of Small Molecule Lipid II Inhibitors as Novel Antibiotics
Source: PubMed Central journal article supplement (PMC5077133; doi:10.1371/journal.pone.0164515), 2016-10-24
Supplement: pone.0164515.s002.pdf [file pone.0164515.s002.pdf]

| ID and structural formula                                                                                | chemical formula                                                  | MW (g/mol) | IUPAC name                                                         | Lipid II binding | <i>S. aureus</i> killing |
|----------------------------------------------------------------------------------------------------------|-------------------------------------------------------------------|------------|--------------------------------------------------------------------|------------------|--------------------------|
| 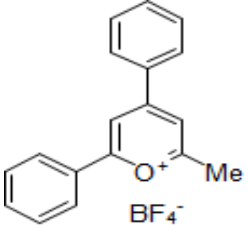 <p><b>6jc26</b></p>    | C <sub>18</sub> H <sub>15</sub> BF <sub>4</sub> O                 | 334.12     | 2-methyl-4,6-diphenylpyrylium boron tetrafluoride salt             | no               | >64                      |
|  <p><b>6jc32-1</b></p>  | C <sub>18</sub> H <sub>13</sub> BCl <sub>2</sub> F <sub>4</sub> O | 403.01     | 2,4-bis(4-chlorophenyl)-6-methylpyrylium boron tetrafluoride salt  | no               | >64                      |
|  <p><b>6jc32-2</b></p> | C <sub>20</sub> H <sub>19</sub> BF <sub>4</sub> O <sub>3</sub>    | 394.17     | 2,4-bis(4-methoxyphenyl)-6-methylpyrylium boron tetrafluoride salt | no               | >64                      |

|                                                                                                                                    |                                                    |        |                                                                                                         |    |     |
|------------------------------------------------------------------------------------------------------------------------------------|----------------------------------------------------|--------|---------------------------------------------------------------------------------------------------------|----|-----|
| 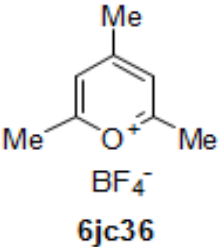 <p style="text-align: center;"><b>6jc36</b></p>  | C <sub>8</sub> H <sub>11</sub> BF <sub>4</sub> O   | 209.98 | 2,4,6-trimethylpyrylium boron tetrafluoride salt                                                        | no | >64 |
|  <p style="text-align: center;"><b>6jc37</b></p>  | C <sub>17</sub> H <sub>20</sub> BF <sub>4</sub> NO | 341.15 | (E)-4-(4-(dimethylamino)styryl)-2,6-dimethylpyrylium boron tetrafluoride salt                           | no | 16  |
|  <p style="text-align: center;"><b>6jc38</b></p> | C <sub>19</sub> H <sub>22</sub> BF <sub>4</sub> NO | 367.19 | 4-((1E,3E)-4-(4-(dimethylamino)phenyl)buta-1,3-dien-1-yl)-2,6-dimethylpyrylium boron tetrafluoride salt | no | 32  |

|                                                                                                         |                        |        |                                                                                                         |     |    |
|---------------------------------------------------------------------------------------------------------|------------------------|--------|---------------------------------------------------------------------------------------------------------|-----|----|
| 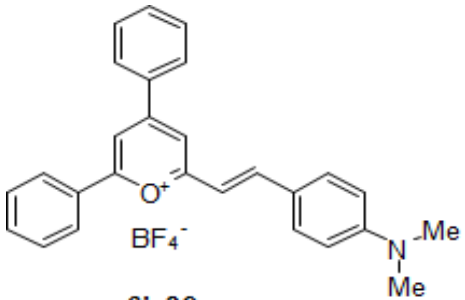 <p><b>6jc39</b></p>    | $C_{27}H_{24}BF_4NO$   | 465.29 | (E)-2-(4-(dimethylamino)styryl)-4,6-diphenylpyrylium boron tetrafluoride salt                           | yes | 2  |
|  <p><b>6jc41-1</b></p>  | $C_{27}H_{22}Cl_2NO^+$ | 534.18 | (E)-2,4-bis(4-chlorophenyl)-6-(4-(dimethylamino)styryl)pyrylium boron tetrafluoride salt                | yes | 32 |
|  <p><b>6jc43-1</b></p> | $C_{29}H_{26}BF_4NO$   | 491.33 | 2-((1E,3E)-4-(4-(dimethylamino)phenyl)buta-1,3-dien-1-yl)-4,6-diphenylpyrylium boron tetrafluoride salt | yes | 4  |

|                                                                                                          |                          |        |                                                                                                                    |     |     |
|----------------------------------------------------------------------------------------------------------|--------------------------|--------|--------------------------------------------------------------------------------------------------------------------|-----|-----|
| 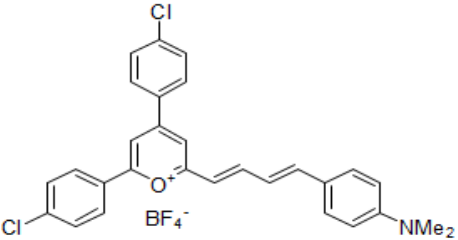 <p><b>6jc43-2</b></p>   | $C_{29}H_{24}BCl_2F_4NO$ | 560.22 | 2,4-bis(4-chlorophenyl)-6-((1E,3E)-4-(4-(dimethylamino)phenyl)buta-1,3-dien-1-yl)pyrylium boron tetrafluoride salt | ND  | >64 |
|  <p><b>6jc48-1</b></p>   | $C_{27}H_{22}BBr_2F_4NO$ | 623.08 | (E)-2,4-bis(4-bromophenyl)-6-(4-(dimethylamino)styryl)pyrylium boron tetrafluoride salt                            | yes | 32  |
|  <p><b>6jc48-2</b></p> | $C_{29}H_{24}BBr_2F_4NO$ | 649.12 | 2,4-bis(4-bromophenyl)-6-((1E,3E)-4-(4-(dimethylamino)phenyl)buta-1,3-dien-1-yl)pyrylium boron tetrafluoride salt  | yes | >64 |

|                                                                                                         |                      |        |                                                                                 |     |     |
|---------------------------------------------------------------------------------------------------------|----------------------|--------|---------------------------------------------------------------------------------|-----|-----|
| 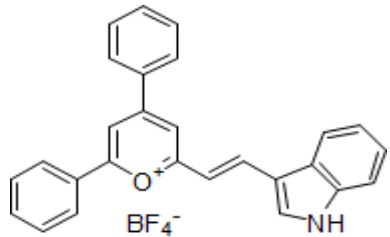 <p><b>6jc49-1</b></p> | $C_{27}H_{20}BF_4NO$ | 461.26 | (E)-2-(2-(1H-indol-3-yl)vinyl)-4,6-diphenylpyrylium boron tetrafluoride salt    | yes | 1   |
|  <p><b>6jc50-2</b></p> | $C_{20}H_{19}BF_4O$  | 362.17 | 2-methyl-4,6-di-p-tolylpyrylium boron tetrafluoride salt                        | no  | >64 |
|  <p><b>6jc51-1</b></p> | $C_{29}H_{28}BF_4NO$ | 493.34 | (E)-2-(4-(dimethylamino)styryl)-4,6-di-p-tolylpyrylium boron tetrafluoride salt | yes | 0.5 |

|                                                                                                         |                          |        |                                                                                                           |     |    |
|---------------------------------------------------------------------------------------------------------|--------------------------|--------|-----------------------------------------------------------------------------------------------------------|-----|----|
| 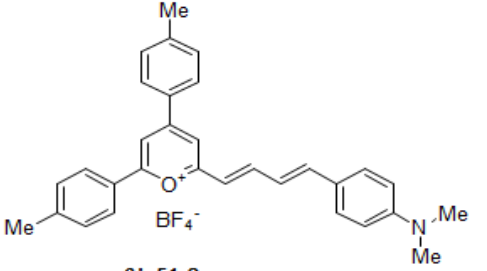 <p><b>6jc51-2</b></p>  | $C_{31}H_{30}BF_4NO$     | 519.38 | 2-((1E,3E)-4-(4-(dimethylamino)phenyl)buta-1,3-dien-1-yl)-4,6-di-p-tolylpyrylium boron tetrafluoride salt | yes | 2  |
|  <p><b>6jc53-1</b></p> | $C_{27}H_{18}BCl_2F_4NO$ | 530.15 | (E)-2-(2-(1H-indol-3-yl)vinyl)-4,6-bis(4-chlorophenyl)pyrylium boron tetrafluoride salt                   | yes | 16 |
|  <p><b>6jc53-2</b></p> | $C_{29}H_{24}BF_4NO$     | 489.31 | (E)-2-(2-(1H-indol-3-yl)vinyl)-4,6-di-p-tolylpyrylium boron tetrafluoride salt                            | yes | 4  |

|                                                                                                         |                          |        |                                                                                        |     |     |
|---------------------------------------------------------------------------------------------------------|--------------------------|--------|----------------------------------------------------------------------------------------|-----|-----|
| 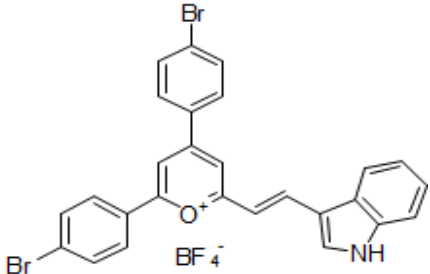 <p><b>6jc53-3</b></p> | $C_{27}H_{18}BBr_2F_4NO$ | 619.05 | (E)-2-(2-(1H-indol-3-yl)vinyl)-4,6-bis(4-bromophenyl)pyrylium boron tetrafluoride salt | yes | >64 |
|  <p><b>6jc56</b></p>   | $C_{26}H_{32}BF_4O$      | 446.33 | 2,4-bis(4-(tert-butyl)phenyl)-6-methylpyrylium boron tetrafluoride salt                | no  | >64 |
|  <p><b>6jc57</b></p>  | $C_{22}H_{23}BF_4NO$     | 390.22 | 2,4-bis(3,4-dimethylphenyl)-6-methylpyrylium boron tetrafluoride salt                  | no  | >64 |

|                                                                                                          |                      |        |                                                                                                                        |     |    |
|----------------------------------------------------------------------------------------------------------|----------------------|--------|------------------------------------------------------------------------------------------------------------------------|-----|----|
| 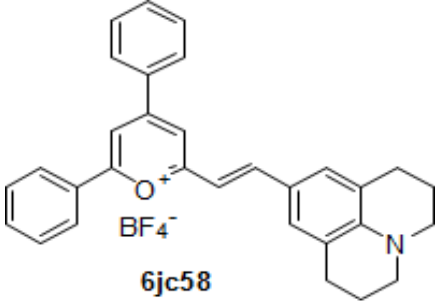 <p><b>6jc58</b></p>     | $C_{31}H_{28}BF_4NO$ | 517.36 | (E)-2-(2-(1,2,3,5,6,7-hexahydropyrido[3,2,1-ij]quinolin-9-yl)vinyl)-4,6-diphenylpyrylium boron tetrafluoride salt      | yes | 1  |
|  <p><b>6jc59-1</b></p>   | $C_{31}H_{32}BF_4NO$ | 521.40 | (E)-2-(4-(dimethylamino)styryl)-4,6-bis(3,4-dimethylphenyl)pyrylium boron tetrafluoride salt                           | yes | 2  |
|  <p><b>6jc59-2</b></p> | $C_{31}H_{28}BF_4NO$ | 547.43 | 2-((1E,3E)-4-(4-(dimethylamino)phenyl)buta-1,3-dien-1-yl)-4,6-bis(3,4-dimethylphenyl)pyrylium boron tetrafluoride salt | yes | 32 |



|                                                                                                          |                      |        |                                                                                                                          |     |    |
|----------------------------------------------------------------------------------------------------------|----------------------|--------|--------------------------------------------------------------------------------------------------------------------------|-----|----|
| 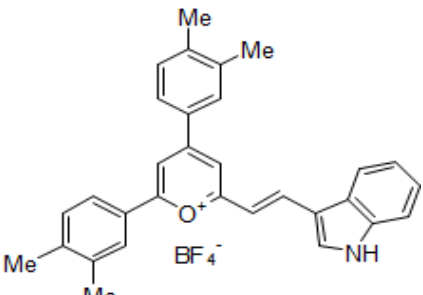 <p><b>6jc59-3</b></p>   | $C_{33}H_{34}BF_4NO$ | 517.36 | (E)-2-(2-(1H-indol-3-yl)vinyl)-4,6-bis(3,4-dimethylphenyl)pyrylium boron tetrafluoride salt                              | yes | 4  |
|  <p><b>6jc60-1</b></p>   | $C_{35}H_{40}BF_4NO$ | 577.50 | (E)-2,4-bis(4-(tert-butyl)phenyl)-6-(4-(dimethylamino)styryl)pyrylium boron tetrafluoride salt                           | yes | 8  |
|  <p><b>6jc60-2</b></p> | $C_{37}H_{42}BF_4NO$ | 603.54 | 2,4-bis(4-(tert-butyl)phenyl)-6-((1E,3E)-4-(4-(dimethylamino)phenyl)buta-1,3-dien-1-yl)pyrylium boron tetrafluoride salt | yes | 64 |

|                                                                                                           |                      |        |                                                                                               |     |     |
|-----------------------------------------------------------------------------------------------------------|----------------------|--------|-----------------------------------------------------------------------------------------------|-----|-----|
| 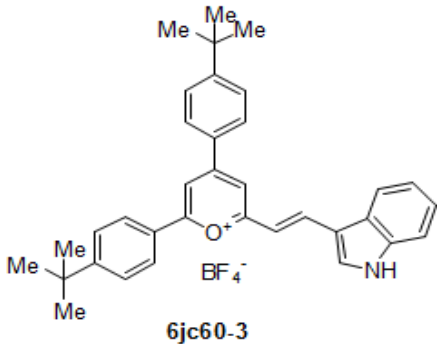 <p><b>6jc60-3</b></p>    | $C_{35}H_{36}BF_4NO$ | 573.47 | (E)-2-(2-(1H-indol-3-yl)vinyl)-4,6-bis(4-(tert-butyl)phenyl)pyrylium boron tetrafluoride salt | yes | 32  |
|  <p><b>6jc61</b></p>     | $C_{22}H_{23}BF_4O$  | 390.22 | 2,4-bis(4-ethylphenyl)-6-methylpyrylium boron tetrafluoride salt                              | no  | >64 |
|  <p><b>6jc64-1</b></p> | $C_{31}H_{32}BF_4NO$ | 521.40 | (E)-2-(4-(dimethylamino)styryl)-4,6-bis(4-ethylphenyl)pyrylium boron tetrafluoride salt       | yes | 1   |

|                                                                                                   |                      |        |                                                                                                                     |     |   |
|---------------------------------------------------------------------------------------------------|----------------------|--------|---------------------------------------------------------------------------------------------------------------------|-----|---|
| 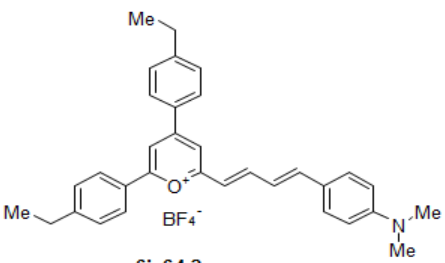 <p>6jc64-2</p>  | $C_{33}H_{34}BF_4NO$ | 547.43 | 2-((1E,3E)-4-(4-(dimethylamino)phenyl)buta-1,3-dien-1-yl)-4,6-bis(4-ethylphenyl)pyrylium boron tetrafluoride salt   | yes | 8 |
|  <p>6jc64-3</p>  | $C_{31}H_{28}BF_4NO$ | 517.36 | (E)-2-(2-(1H-indol-3-yl)vinyl)-4,6-bis(4-ethylphenyl)pyrylium boron tetrafluoride salt                              | yes | 4 |
|  <p>6jc65-1</p> | $C_{33}H_{32}BF_4NO$ | 545.42 | (E)-2-(2-(1,2,3,5,6,7-hexahydropyrido[3,2,1-ij]quinolin-9-yl)vinyl)-4,6-di-p-tolylpyrylium boron tetrafluoride salt | yes | 1 |

|                                                                                                           |                      |        |                                                                                                        |     |     |
|-----------------------------------------------------------------------------------------------------------|----------------------|--------|--------------------------------------------------------------------------------------------------------|-----|-----|
| 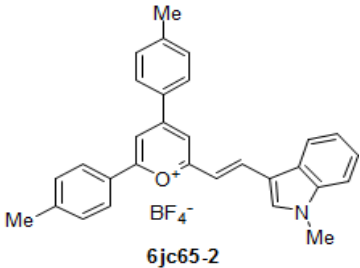 <p><b>6jc65-2</b></p>   | $C_{30}H_{26}BF_4NO$ | 503.34 | (E)-2-(2-(1-methyl-1H-indol-3-yl)vinyl)-4,6-di-p-tolylpyrylium boron tetrafluoride salt                | yes | 0.5 |
|  <p><b>6jc66-1</b></p>   | $C_{28}H_{22}BF_4NO$ | 475.28 | (E)-2-(2-(1-methyl-1H-indol-3-yl)vinyl)-4,6-diphenylpyrylium boron tetrafluoride salt                  | yes | 0.5 |
|  <p><b>6jc66-2</b></p>  | $C_{32}H_{30}BF_4NO$ | 531.39 | (E)-2,4-bis(4-ethylphenyl)-6-(2-(1-methyl-1H-indol-3-yl)vinyl)pyrylium boron tetrafluoride salt        | yes | 1   |
|  <p><b>6jc66-3</b></p> | $C_{36}H_{38}BF_4NO$ | 587.50 | (E)-2,4-bis(4-(tert-butyl)phenyl)-6-(2-(1-methyl-1H-indol-3-yl)vinyl)pyrylium boron tetrafluoride salt | yes | 16  |

|                                                                                                    |                          |        |                                                                                                                |     |     |
|----------------------------------------------------------------------------------------------------|--------------------------|--------|----------------------------------------------------------------------------------------------------------------|-----|-----|
| 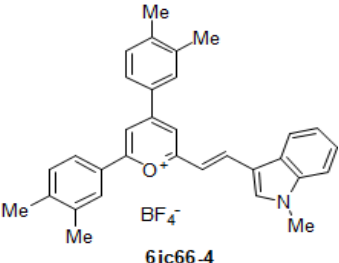 <p>6jc66-4</p>   | $C_{32}H_{30}BF_4NO$     | 531.39 | (E)-2,4-bis(3,4-dimethylphenyl)-6-(2-(1-methyl-1H-indol-3-yl)vinyl)pyrylium boron tetrafluoride salt           | yes | 1   |
|  <p>6jc67</p>      | $C_{31}H_{28}BF_4NO$     | 430.57 | 2,4-diphenyl-6-((1E,3E)-3-(1,3,3-trimethylindolin-2-ylidene)prop-1-en-1-yl)pyrylium boron tetrafluoride salt   | yes | 0.5 |
|  <p>6jc67-A</p>  | $C_{33}H_{32}BF_4NO$     | 448.57 | 2,4-di-p-tolyl-6-((1E,3E)-3-(1,3,3-trimethylindolin-2-ylidene)prop-1-en-1-yl)pyrylium boron tetrafluoride salt | yes | 1   |
|  <p>6jc68-1</p> | $C_{28}H_{20}BCl_2F_4NO$ | 544.18 | (E)-2,4-bis(4-chlorophenyl)-6-(2-(1-methyl-1H-indol-3-yl)vinyl)pyrylium boron tetrafluoride salt               | ND  | 64  |

|                                                                                                    |                          |        |                                                                                                                    |     |     |
|----------------------------------------------------------------------------------------------------|--------------------------|--------|--------------------------------------------------------------------------------------------------------------------|-----|-----|
| 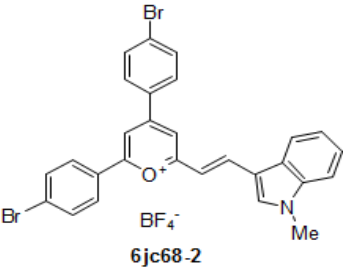 <p>6jc68-2</p>   | $C_{28}H_{20}BBr_2F_4NO$ | 633.08 | (E)-2,4-bis(4-bromophenyl)-6-(2-(1-methyl-1H-indol-3-yl)vinyl)pyrylium boron tetrafluoride salt                    | ND  | 64  |
|  <p>6jc69-1</p>   | $C_{35}H_{36}BF_4NO$     | 573.74 | (E)-2,4-bis(4-ethylphenyl)-6-(2-(1,2,3,5,6,7-hexahydroquinolin-9-yl)vinyl)pyrylium boron tetrafluoride salt        | yes | 1   |
|  <p>6jc69-2</p>  | $C_{39}H_{44}BF_4NO$     | 629.58 | (E)-2,4-bis(4-(tert-butyl)phenyl)-6-(2-(1,2,3,5,6,7-hexahydroquinolin-9-yl)vinyl)pyrylium boron tetrafluoride salt | yes | 32  |
|  <p>6jc69-3</p> | $C_{37}H_{40}BF_4NO$     | 573.47 | (E)-2,4-bis(3,4-dimethylphenyl)-6-(2-(1,2,3,5,6,7-hexahydroquinolin-9-yl)vinyl)pyrylium boron tetrafluoride salt   | yes | 0.5 |

|                                                                                                                                     |                          |        |                                                                                                                              |     |   |
|-------------------------------------------------------------------------------------------------------------------------------------|--------------------------|--------|------------------------------------------------------------------------------------------------------------------------------|-----|---|
| 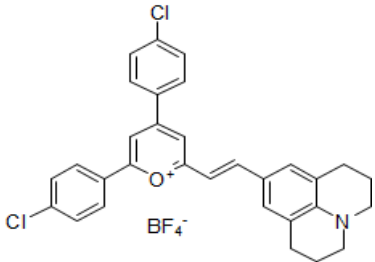 <p style="text-align: center;"><b>6jc69.4</b></p> | $C_{31}H_{26}BCl_2F_4NO$ | 586.25 | (E)-2,4-bis(4-chlorophenyl)-6-(2-(1,2,3,5,6,7-hexahydropyrido[3,2,1-ij]quinolin-9-yl)vinyl)pyrylium boron tetrafluoride salt | yes | 1 |
|  <p style="text-align: center;"><b>6jc69.5</b></p> | $C_{31}H_{26}BBr_2F_4NO$ | 675.16 | (E)-2,4-bis(4-bromophenyl)-6-(2-(1,2,3,5,6,7-hexahydropyrido[3,2,1-ij]quinolin-9-yl)vinyl)pyrylium boron tetrafluoride salt  | yes | 4 |
